# Supplementary material for: A highly sensitive and water soluble fluorescent probe for rapid detection of hydrogen sulfide in living cells
Source: Royal Society of Chemistry journal article supplement (doi:10.1039/c4ra05430j), 2014-01-01

## A Highly Sensitive and Water Soluble Fluorescent Probe for Rapid

### Detection of Hydrogen Sulfide in Living Cells

Xin Li,<sup>\*,a</sup> Yanling Gong,<sup>a</sup> Kai Wu,<sup>b</sup> Steven H. Liang,<sup>c</sup> Ji Cao,<sup>a</sup> Bo Yang,<sup>a</sup> Yongzhou Hu,<sup>a</sup> and Yifeng Han<sup>\*,b</sup>

<sup>a</sup> College of Pharmaceutical Sciences, Zhejiang University, Hangzhou 310058, China

<sup>b</sup> Department of Chemistry, Zhejiang Sci-Tech University, Hangzhou, 310018, China

<sup>c</sup> Division of Nuclear Medicine and Molecular Imaging, Massachusetts General Hospital and Department of Radiology, Harvard Medical School, 55 Fruit St., Boston, MA 02114, USA

#### SUPPORTING INFORMATION

##### Table of Contents

|                                                                                                                  |           |
|------------------------------------------------------------------------------------------------------------------|-----------|
| <b>General experimental</b> .....                                                                                | page S-2  |
| <b>Synthesis and characterization (Scheme S1)</b> .....                                                          | page S-2  |
| <b>Fluorometric analysis</b> .....                                                                               | page S-3  |
| <b>Fluorescence quantum yield measurements</b> .....                                                             | page S-4  |
| <b>Detection limit measurement</b> .....                                                                         | page S-4  |
| <b>Cell lines and imaging experiments</b> .....                                                                  | page S-4  |
| <b>Job's plot for determining the stoichiometry of ZS2 and Cu<sup>2+</sup> in PBS (Fig. S1)</b> .....            | page S-5  |
| <b>UV-vis spectrum of ZS2 before and after the treatment with Cu<sup>2+</sup> (Fig. S2)</b> .....                | page S-5  |
| <b>Fluorescence responses of ZS2 towards various cations (Fig. S3)</b> .....                                     | page S-6  |
| <b>Fluorescence response of ZS2-Cu towards NaHS in the presence of other anions or biothiols (Fig. S4)</b> ..... | page S-6  |
| <b>Microscopy images of Cu<sup>2+</sup> and H<sub>2</sub>S detection in live cells using ZS2 (Fig. S5)</b> ..... | page S-7  |
| <b>NMR and MS Spectra of Compounds</b>                                                                           |           |
| <b>ZS2 <sup>1</sup>H NMR</b> .....                                                                               | page S-8  |
| <b>ZS2 <sup>13</sup>C NMR</b> .....                                                                              | page S-9  |
| <b>ZS2 HR-MS</b> .....                                                                                           | page S-10 |
| <b>ZS2-Cu HR-MS</b> .....                                                                                        | page S-10 |

## General Experimental

$\alpha$ -Chloro-BODIPY (**1**) and *N,N*-bis(pyridin-2-ylmethyl)ethane-1,2-diamine (**2**) were prepared referring to literature procedures.<sup>1</sup>

Isolated yields refer to spectroscopically (<sup>1</sup>H NMR) homogeneous materials. Reactions were monitored by thin-layer chromatography (TLC) carried out on Silica gel 60 F254 plates supplied by Qingdao Puke Separation Material Corporation using UV light as the visualizing agent. Flash column chromatography was performed using 200-300 mesh silica gel supplied by Qingdao Marine Chemical Factory, Qingdao, P. R. <sup>1</sup>H-NMR spectra were recorded on a Bruker Fourier transform spectrometer (400 MHz) at 25 °C. <sup>13</sup>C-NMR spectra were recorded on a Bruker Fourier transform spectrometer (100 Hz) spectrometer and were calibrated using residual undeuterated solvent as an internal reference (CDCl<sub>3</sub>: <sup>1</sup>H NMR = 7.26, <sup>13</sup>C NMR = 77.16). All chemical shifts were given in ppm and coupling constants (*J*) in Hz. The following abbreviations or combinations thereof were used to explain the multiplicities: s = singlet, d = doublet, m = multiplet. IR spectra were recorded on a Bruker Vector 22 spectrophotometer as KBr pellets. High resolution mass spectra (HRMS) were recorded on an Agilent 6224 TOF LC/MS spectrometer using ESI-TOF (electrospray ionization-time of flight). Absorption spectra were acquired using a Hitachi U-3010 spectrophotometer. Fluorescence measurements were carried out on a PE LS45 fluorescence spectrometer.

### Scheme S1. Synthesis of ZS2 and ZS2-Cu

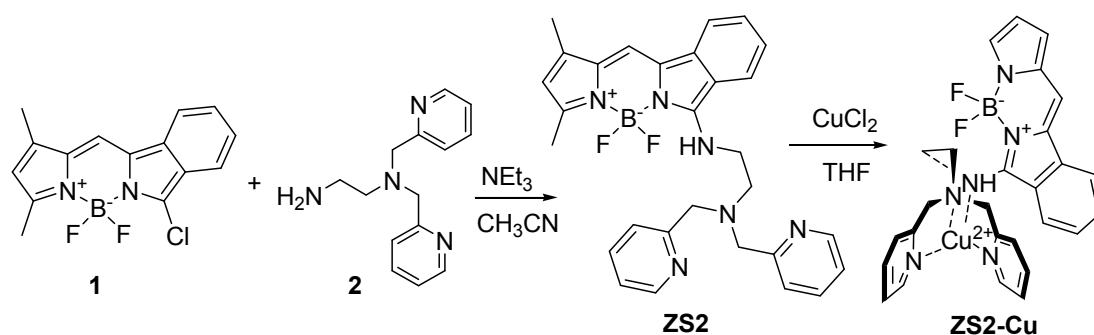

**ZS2**: To a stirred solution of  $\alpha$ -Chloro-BODIPY (**1**, 100 mg, 0.330 mmol) and *N,N*-bis(pyridin-2-ylmethyl)ethane-1,2-diamine (**2**, 400 mg, 1.65 mmol) in acetonitrile (15.0 mL) was added

<sup>1</sup> L. Jiao, C. Yu, M. Liu, Y. Wu, K. Cong, T. Meng, Y. Wang, E. Hao, *J. Org. Chem.*, 2010, **75**, 6035–8; K. Kiyose, H. Kojima, Y. Urano, T. Nagano, *J. Am. Chem. Soc.*, 2009, **131**, 10077–82.

slowly triethylamine (500  $\mu$ L, 3.58 mmol). The system was then heated to reflux. After 12 hours, the reaction was cooled down to ambient temperature and ethyl acetate (50 mL) was added to dilute the system. The mixture was then washed subsequently with H<sub>2</sub>O (3 x 15 mL) and brine (1 x 15 mL), dried over anhydrous Na<sub>2</sub>SO<sub>4</sub>, filtered, and concentrated under reduced pressure. The crude mixture was purified by flash column chromatography (SiO<sub>2</sub>: EtOAc / petroleum ether, 1:1 to give the product as a red solid (150 mg, 90% yield).

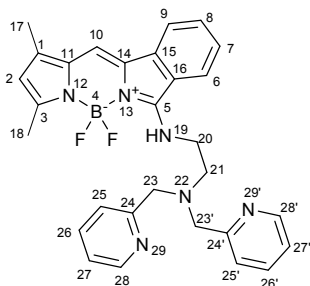

**Rf** = 0.43 (40:1 CH<sub>2</sub>Cl<sub>2</sub>:CH<sub>3</sub>OH)

**$\delta_H$  (400 MHz, CDCl<sub>3</sub>):** 8.48 (2 H, d, *J* 4.5, H-28 and H-28'), 7.79 (2 H, m, H-26 and H-26'), 7.67 (4 H, m, H-25, H-25', H-6 and H-9), 7.43 (1 H, m, H-8), 7.18 (1 H, m, H-7), 7.05 (2 H, m, H-27), 6.83 (1 H, s, H-10), 5.90 (1 H, s, H-2), 3.91 (4 H, s, H-23 and H-23'), 3.86 (2 H, m, H-20), 2.96 (2 H, m, H-21), 2.56 (3 H, s, H-18), 2.20 (3 H, s, H-17).

**$\delta_C$  (100 MHz, CDCl<sub>3</sub>):** 158.43, 156.58, 148.87, 140.16, 137.72, 137.04, 131.21, 128.42, 127.59, 126.03, 124.56, 123.33, 122.42, 119.82, 113.52, 106.02, 60.42, 51.87, 41.57, 13.90, 11.02.

**IR** ( $\nu_{\max}$ , cm<sup>-1</sup>): 1620 (C=N), 1601 (C=N), 1445 (C=C), 1430 (C=C), 1263 (B-F), 1140 (C-N), 1042 (C-N).

**ESI-HRMS (m/z):** [M+H]<sup>+</sup> calc'd. for C<sub>29</sub>H<sub>28</sub>BCuF<sub>2</sub>N<sub>6</sub>: 511.2593; found 511.2601.

**ZS2-Cu:** To a solution of **ZS2** (50 mg, 0.10 mmol) in THF (50 mL) was added CuCl<sub>2</sub> · 2H<sub>2</sub>O (17 mg, 0.10 mmol, 1.0 eq). The mixture was stirred at ambient temperature in dark for 2 days. Evaporation of the volatile solvent under reduced pressure gave the crude product which was rinsed with THF (10 mL) to yield **ZS2-Cu** as a black red powder quantitatively.

**ESI-HRMS (m/z):** [M+Cu<sup>2+</sup>-H]<sup>+</sup> calc'd. for C<sub>29</sub>H<sub>28</sub>BCuF<sub>2</sub>N<sub>6</sub>: 572.1733; found 572.1735.

### Fluorometric analysis

All fluorescence measurements were carried out at room temperature in PBS (10 mmol, pH 7.4)

which was prepared with DI water and purged with nitrogen for 5 minutes before use. The probes were dissolved in CH<sub>3</sub>CN to make a 1.0 mM stock solution, which was diluted to the required concentrations with PBS for measurements. NaHS was dissolved in the above mentioned deoxygenated PBS to make a stock solution of 1.0 mM and only fresh solutions were used. All fluorometric experiments were repeated at least three times.

### **Fluorescence quantum yield measurements**

Fluorescence quantum yields were obtained by comparison with fluorescein ( $\Phi$  0.95, in 0.1 M NaOH) with the following equation where  $\Sigma[F]$  is the integrated fluorescence intensity, Abs is absorbance at  $\lambda_{ex}$  496 nm, and n represents the refractive index. For PBS and 0.1 M NaOH, we used refractive indices of 1.334 and 1.335 respectively.

$$\Phi_{\text{sample}} = \Phi_{\text{standard}} \times (\text{Abs}_{\text{standard}} / \text{Abs}_{\text{sample}}) \times (\Sigma[F_{\text{sample}}] / \Sigma[F_{\text{standard}}]) \times (n_{\text{sample}}^2 / n_{\text{standard}}^2)$$

### **Detection limit**

The detection limit of **ZS2-Cu** was determined as the concentration of NaHS that resulted in a threefold increase in the fluorescence intensity at 546 nm compared to **ZS2-Cu** (0.5  $\mu$ M) in PBS (10 mM, pH 7.4, 25°C). The slit width was 5 nm for both excitation and emission.

### **Cell lines**

HeLa cell line was purchased from the Cell Bank of Type Culture Collection of Chinese Academy of Sciences (Shanghai, China). Cells were cultured in DMEM (Invitrogen, Carlsbad, CA), supplemented with 10% fetal bovine serum in a humidified atmosphere of 5% CO<sub>2</sub> at 37°C.

### **Imaging experiments**

Exponentially growing cells (at a density of 20000-40000 cells per well, respectively) were seeded in 24-well plate. Cells were cultured at 37°C in a 5%CO<sub>2</sub> atmosphere for 24 h before they were exposed to reagents. After the staining steps as described in figure captions respectively, the images were collected on a fluorescence microscope (LEICA DMI 4000B) upon excitation at 488 nm.

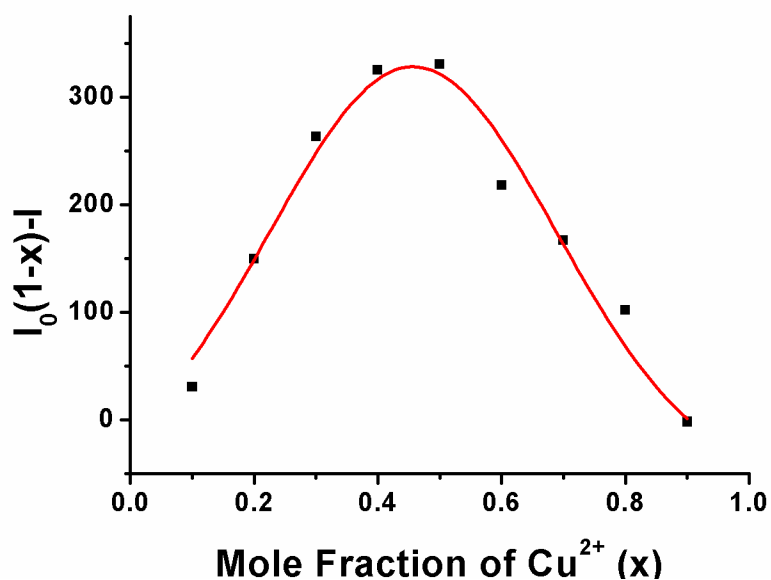

**Fig. S1** Job's plot for determining the stoichiometry of **ZS2** and  $\text{Cu}^{2+}$  in PBS (10 mM, pH 7.4, 25°C). The total concentration of **ZS2** and  $\text{Cu}^{2+}$  was 20  $\mu\text{M}$  and the excitation wavelength was 480 nm.

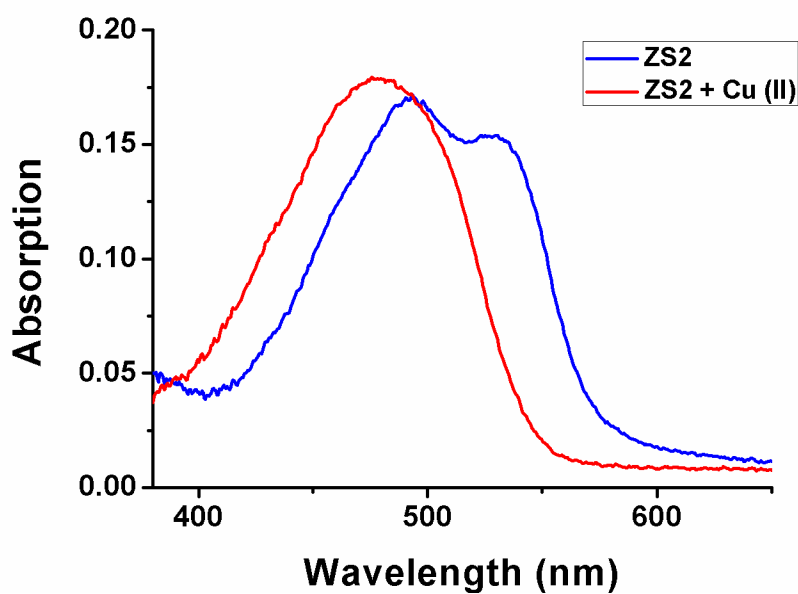

**Fig. S2** UV-vis spectrum of **ZS2** (10  $\mu\text{M}$ ) in PBS (10 mM, pH 7.4, 25°C) and that of the system after the addition of 1.0 eq of  $\text{CuCl}_2$ .

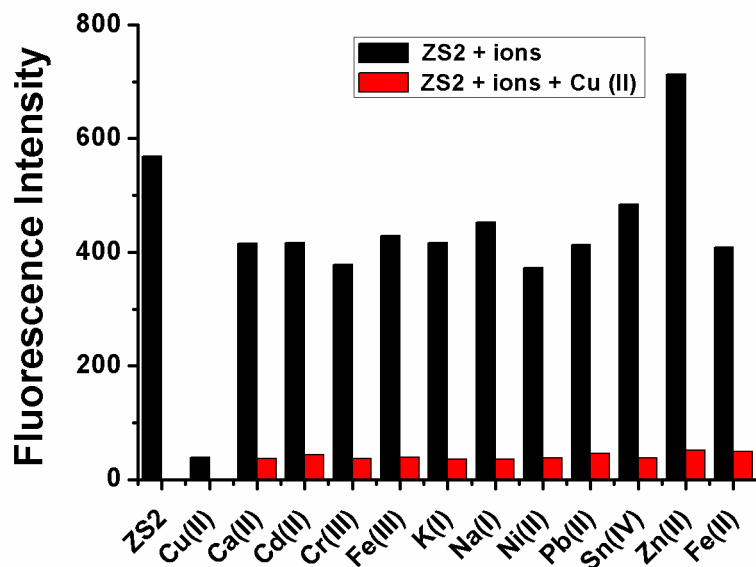

**Fig. S3** Fluorescence responses of **ZS2** towards various cations with or without the presence of  $\text{Cu}^{2+}$ . Data were obtained as the fluorescence intensity at 546 nm ( $\lambda_{\text{ex}}$  480 nm) in PBS buffer (10 mM, pH 7.4, 25°C) right after treating **ZS2** with the cation indicated. The slit width was 3 nm for both excitation and emission. The concentrations of **ZS2** and the cations were both 10  $\mu\text{M}$ . For the coexistence experiments, both  $\text{Cu}^{2+}$  and the tested substrates were kept at a final concentration of 10  $\mu\text{M}$ .

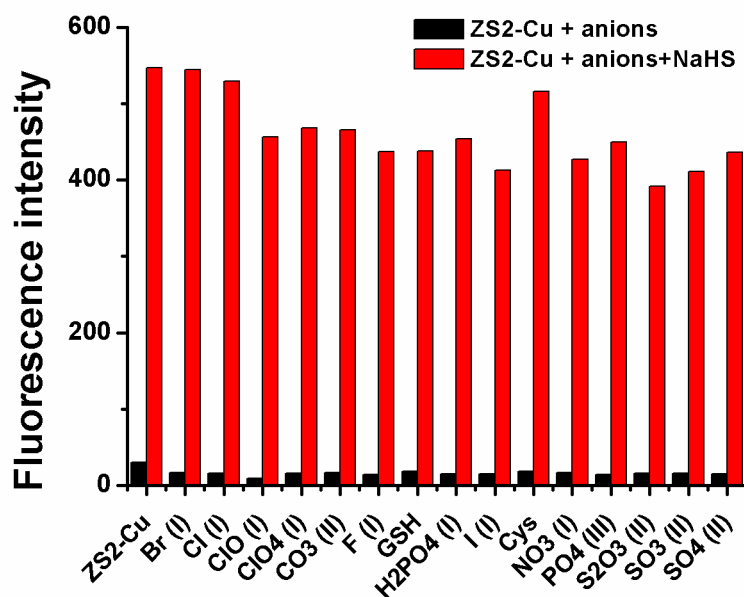

**Fig. S4** Fluorescence responses of **ZS2-Cu** towards NaHS in the presence of other anions or

biothiols. Data were obtained as the fluorescence intensity at 546 nm ( $\lambda_{\text{ex}}$  480 nm) in PBS buffer (10 mM, pH 7.4, 25°C) immediately after treating **ZS2-Cu** with the anion indicated alone (black) or both the anion and NaHS (red). The slit width was 3 nm for both excitation and emission. The concentrations of **ZS2-Cu** and the anions were 10  $\mu\text{M}$  and 20 $\mu\text{M}$ , respectively. For the coexistence experiments, both NaHS and the tested substrates were kept at a final concentration of 20  $\mu\text{M}$ .

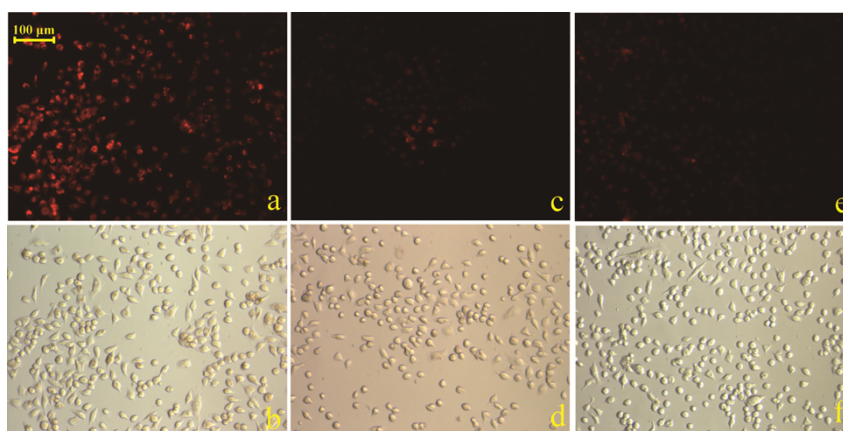

**Fig. S5** **ZS2** acts as a switch-off probe for  $\text{Cu}^{2+}$  and a switch-on probe for  $\text{H}_2\text{S}$  in live cells. (a, b) Cells were incubated with **ZS2** (5  $\mu\text{M}$ ) for 15 min to result in strong intracellular fluorescence. (c, d) Incubating **ZS2**-prereated cells (15 min) with  $\text{CuCl}_2$  (10  $\mu\text{M}$ ) incurred a great decrease in the fluorescence. (e, f) Treatment of cells contacted with **ZS2** and  $\text{Cu}^{2+}$  subsequently with NaHS (100  $\mu\text{M}$ ) rescued the intracellular fluorescence (15 min). Images were collected on a fluorescence microscope (LEICA DMI 4000B) upon excitation at 488 nm (a, c, e) or under bright field (b, d, e).

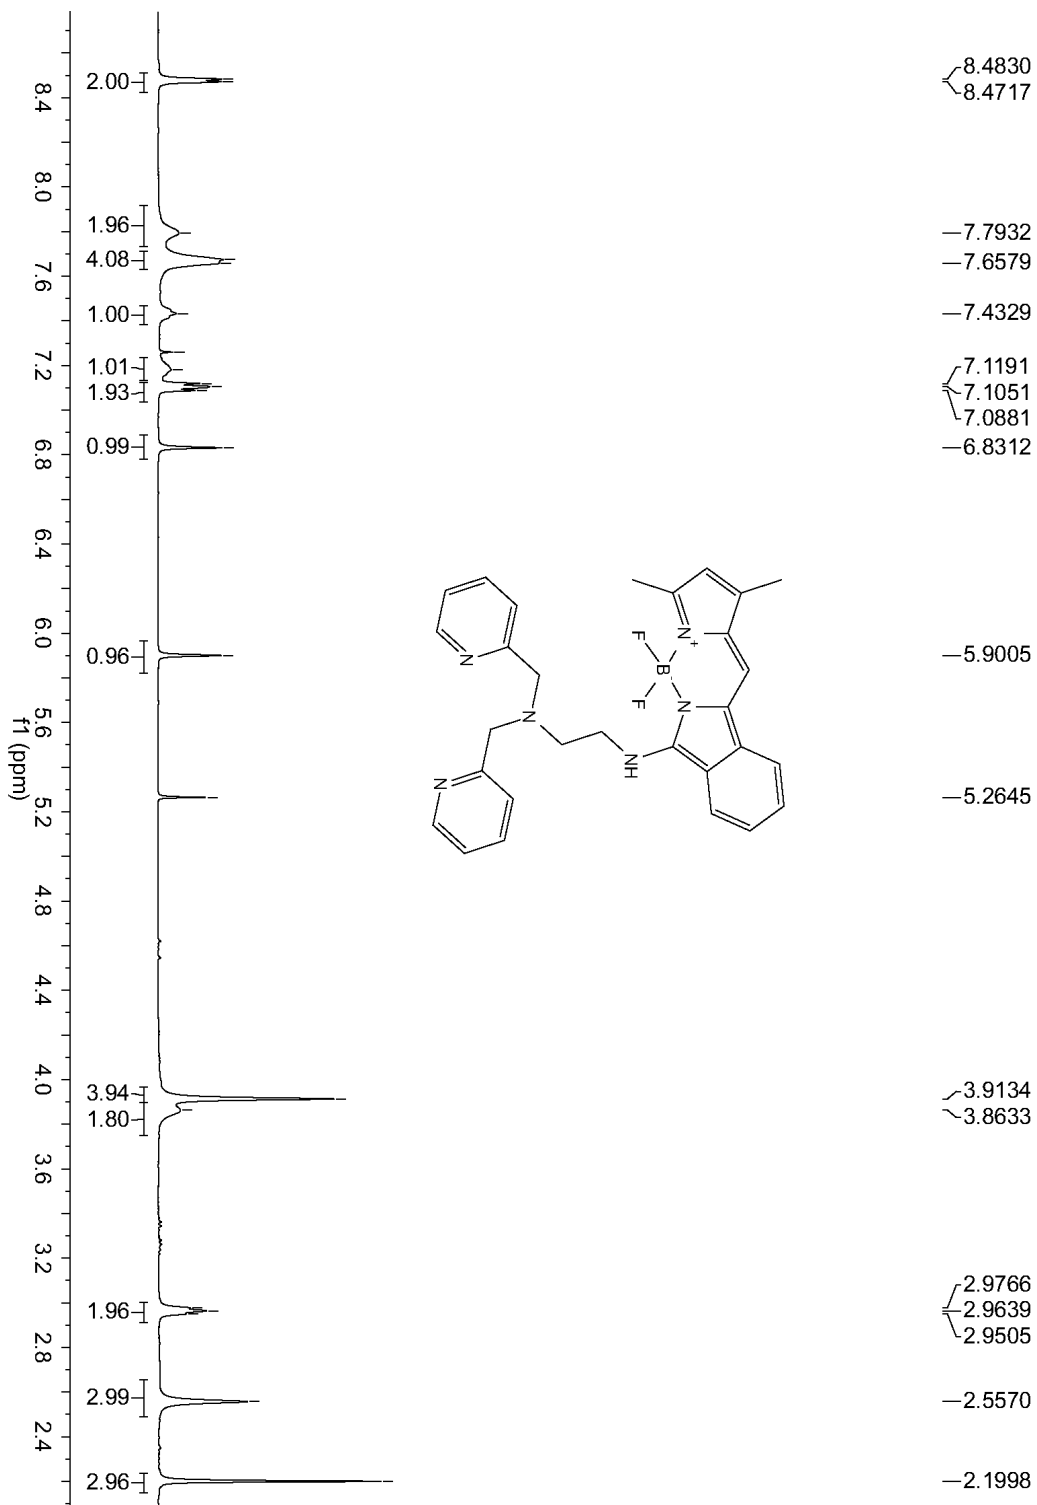



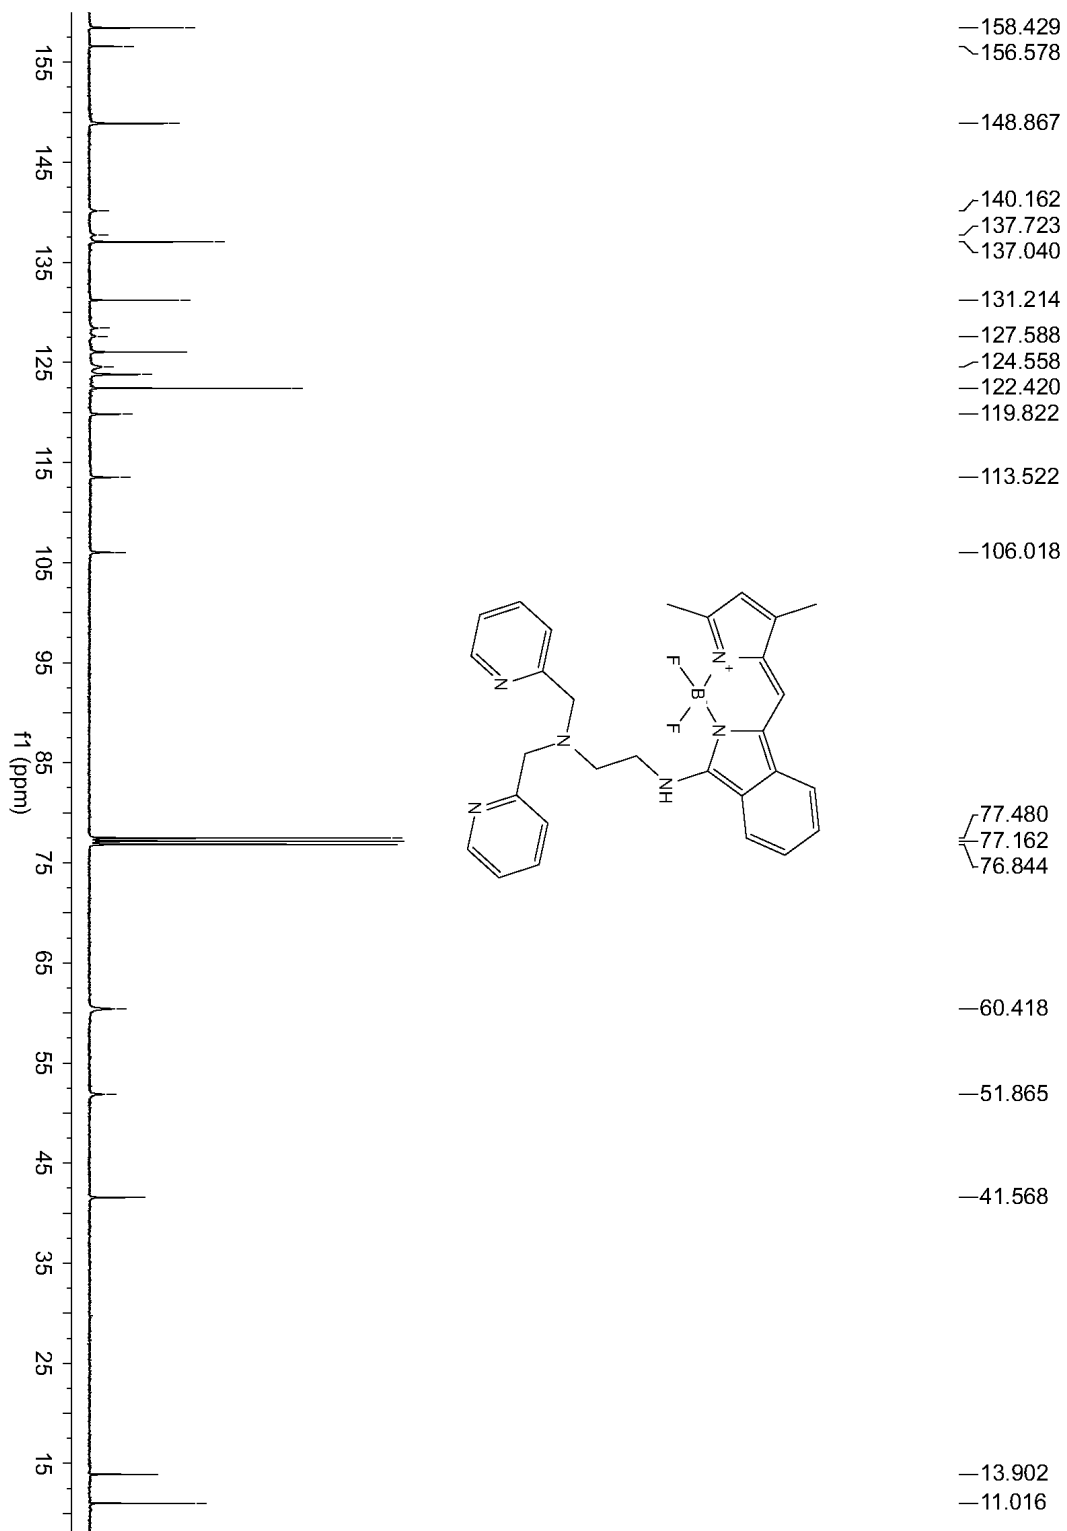

## HRMS spectra of compound ZS2

### Qualitative Analysis Report

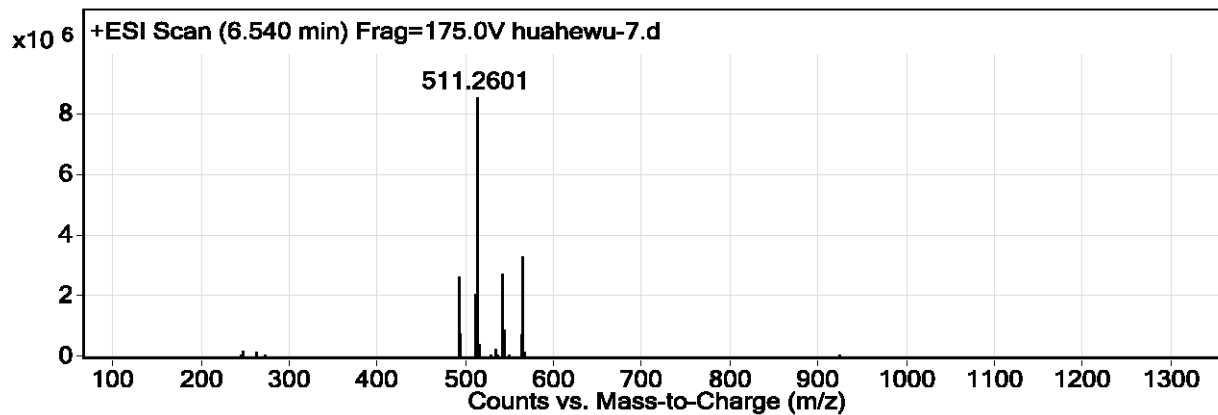

## HRMS spectra of compound ZS2-Cu

### Qualitative Analysis Report

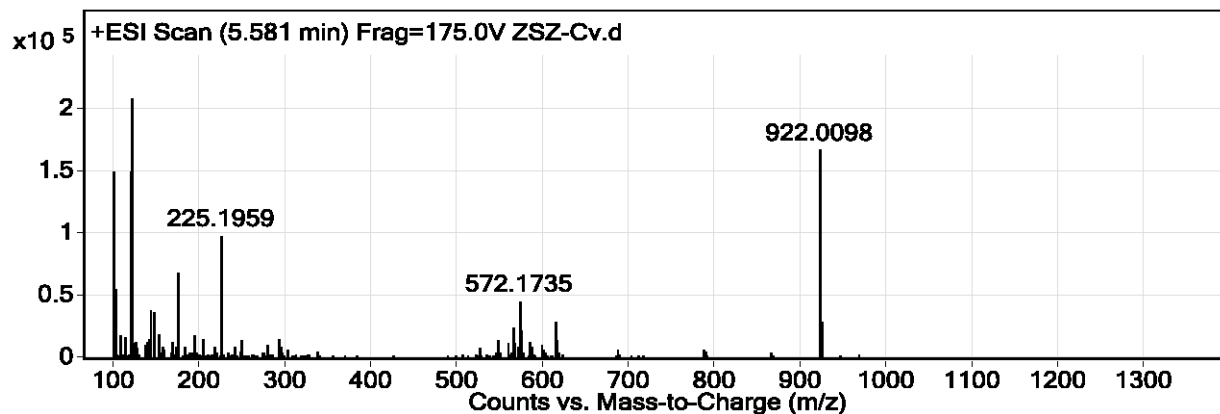

Supplement: c4ra05430j1.pdf [file c4ra05430j1.pdf]
